# Supplementary material
Source: HighWire-hosted journal article supplement (https://bmjopen.bmj.com/content/8/6/e021015)
Supplement: inline-supplementary-material-1 [file inline-supplementary-material-1.pdf]

## Appendix A: Code lists

In order to identify primary diagnoses groups in Table 2 and Figures in Appendix C, we used the following ICD-10 codes:

**Table A1:** ICD-10 codes used to define condition groups

| Primary diagnoses group                                          | ICD-10 codes                                                                                                                              |
|------------------------------------------------------------------|-------------------------------------------------------------------------------------------------------------------------------------------|
| <i>Long-term conditions</i>                                      |                                                                                                                                           |
| Diabetes                                                         | E10-E14, G59.0, G63.2, I79.2, M14.2, N08.3, O24.0, O24.1, O24.2, O24.3, Y42.3                                                             |
| Asthma and chronic lower respiratory disease                     | J41-J47                                                                                                                                   |
| Epilepsy                                                         | F80.3, G40.0, G40.1, G40.2, G40.3, G40.4, G40.6, G40.7, G41, G40.8, G40.9, R56.8, Y46.0, Y46.1, Y46.2, Y46.3, Y46.4, Y46.5, Y46.6         |
| Non-infective enteritis and colitis / inflammatory bowel disease | K50, K51, K52                                                                                                                             |
| <i>Mental health conditions</i>                                  |                                                                                                                                           |
| Substance use                                                    | F10-F19                                                                                                                                   |
| Schizophrenia, schizotypal and delusional disorders              | F20-F29                                                                                                                                   |
| Personality disorders                                            | F60, F61, F69                                                                                                                             |
| Mood disorders                                                   | F30-F39                                                                                                                                   |
| <i>Infections</i>                                                |                                                                                                                                           |
| Enteric / gastrointestinal infection                             | A00-A09, I88.0, K23.0, K23.1, K25-K28, K29.3, K29.4, K29.5, K35-K37, K52.8, K52.9, K61, K63.0, K63.2, K65.0, K67.8, K90.8, K93.0, R11     |
| Respiratory infection                                            | A15-A19, A48.1, A48.2, B59, J00-J06, J10-J22, J32, J36, J37, J39.0, J39.1, J40-J42, J43.0, J44.0, J47, J56, J85, J86, J98.8, N74.0, N74.1 |
| Genitourinary infection                                          | N30.0, N34.1, N35.1, N37, N39.0, N41.0, N41.1, N41.2, N41.3, N43.1, N45, N48.1, N48.2, N49, N51, N70-N74, N75.1, N76.4, N87               |
| <i>Symptoms and signs</i>                                        |                                                                                                                                           |
| Abdominal pain                                                   | R10-R19, K59                                                                                                                              |
| General symptoms and signs                                       | R50-R69                                                                                                                                   |
| Respiratory and circulatory symptoms                             | R00-R09                                                                                                                                   |
| Other symptoms                                                   | R20-49, R70-R99                                                                                                                           |
| <i>Other conditions</i>                                          |                                                                                                                                           |
| Non-inflammatory disease of the female genitourinary system      | N80-N98                                                                                                                                   |
| Other joint/soft tissue disorders                                | M20-M25, M70-M79                                                                                                                          |
| Diseases of male genital organs                                  | N40-N51                                                                                                                                   |

Codes for long-term conditions (apart from sickle cell disease and inflammatory bowel disease) were taken from *Hardelid et al.*<sup>1</sup>, codes for infections were taken from *Baker et al.*<sup>2</sup>. Other groups are based on ICD-10 subchapters.

1. Hardelid P, Dattani N, Davey J, et al. Overview of child deaths in the four UK countries. HQIP [bit.ly/hardelidreport](http://bit.ly/hardelidreport)
2. Barker MG, Barnard LT, Kvalsvig A, et al. Increasing incidence of serious infectious diseases and inequalities in New Zealand: a national epidemiological study. *The Lancet* 2012;**379**:1112-9.
